# Supplementary material
Source: publisher figshare collection journal article supplement (https://acs.figshare.com/ndownloader/files/12795869)
Supplement: Supplementary file 1 [file 12795869]

## Supporting Information

### **Ru Nanospheres in Water Drops for Enhanced Catalytic Performances in Selective Hydrogenation**

Zhikun Peng,<sup>a</sup> Weidong Li,<sup>a</sup> Yalei Miao,<sup>a</sup> Sheng Chen,<sup>a</sup> Guoji Liu,<sup>a</sup> Shouchang Liu,<sup>a</sup>  
Jie Gao,<sup>b,\*</sup> Baojun Li,<sup>a,\*</sup> and Zhongyi Liu<sup>a,\*</sup>

<sup>a</sup> College of Chemistry and Molecular Engineering, School of Chemical Engineering and Energy, Henan Key Laboratory of Green Catalytic Hydrogenation, and Center for Advanced Analysis & Computational Science, Zhengzhou University, 100 Science Road, Zhengzhou 450001, PR China; <sup>b</sup> Integrated Analytical Laboratories, 273 Franklin Rd #10, Randolph, NJ 07869

E-mail: jgao.pipeline@gmail.com (Gao Jie), lbjfc1@zzu.edu.cn (Baojun Li), and liuzhognyi@zzu.edu.cn (Zhongyi Liu).

### *Experimental section*

#### *Preparation of Ru(0) catalyst*

19.46 g  $\text{RuCl}_3 \cdot 3\text{H}_2\text{O}$  was dissolved in 200 mL of  $\text{H}_2\text{O}$  with agitation. 11.12 g NaOH was dissolved in 200 mL of  $\text{H}_2\text{O}$  and then added to the above stirred solution instantaneously and the resulting mixture was agitated for an additional 30 min. The black precipitate was then transferred into a 1 L Hastelloy autoclave. Hydrogen was introduced into the autoclave to raise the total internal pressure of 5 MPa and operated at 150 °C, 800 rpm for 3 h. When the reaction mixture was cooled, the catalyst was washed with deionized water until  $\text{Cl}^-$  was undetectable, and then the desired Ru catalysts were obtained.

**Table S1.** Textural properties and crystallite size of three catalysts.

| Sample                | $S_{\text{BET}}$ ( $\text{m}^2 \text{g}^{-1}$ ) | $V_{\text{Pore}}$ ( $\text{cm}^3 \text{g}^{-1}$ ) | $D_{\text{Pore}}$ | $d_{\text{M}}^{\text{a}}$ |
|-----------------------|-------------------------------------------------|---------------------------------------------------|-------------------|---------------------------|
|                       |                                                 |                                                   | nm                |                           |
| Ru bulk               | 13                                              | 0.02                                              | 6.7               | 4.2                       |
| Ru network            | 15                                              | 0.03                                              | 8.9               | 4.3                       |
| Ru NSs                | 20                                              | 0.05                                              | 9.2               | 4.0                       |
| Ru(0) <sup>[S1]</sup> | 88                                              | 0.18                                              | 4.1               | 4.1                       |

<sup>a</sup> Measured by Scherrer equation.**Table S2.** The variety of Ru catalysts for benzene-selective hydrogenation.

| Catalysts                         | Benzene conv.<br>(%) | CHE select.<br>(%) | $Y_{\text{max}}$ (%) | Reference |
|-----------------------------------|----------------------|--------------------|----------------------|-----------|
| Ru/La <sub>2</sub> O <sub>3</sub> | 40                   | 25                 | 14                   | [1]       |
| Ru-[bmim]BF <sub>4</sub>          | 49.5                 | 34.1               | 17.0                 | [2]       |
| Ru/BEN                            | 59.7                 | 44.9               | 26.8                 | [3]       |
| Ru/Al <sub>2</sub> O <sub>3</sub> | 40                   | 13                 | -                    | [4]       |
| Ru/ZnO-La(OH) <sub>3</sub>        | 48.0                 | 50.3               | 29.2                 | [5]       |
| Ru/ZnO-Mg(OH) <sub>2</sub>        | 49.8                 | 35.2               | 17.5                 | [5]       |
| Ru/SiO <sub>2</sub>               | 64.9                 | 33.1               | 21.5                 | [6]       |
| Ru/ZrO <sub>2</sub> -GLY          | 65                   | 43                 | 28                   | [7]       |
| Ru/ZrO <sub>2</sub> -EG           | 58                   | 41                 | 24                   | [7]       |
| Ru/ZrO <sub>2</sub> -PDO          | 84                   | 37                 | 31                   | [7]       |
| Ru-Cd/BEN                         | 57.4                 | 43.1               | 24.8                 | [8]       |
| Ru-Cu/ZnO                         | 37.2                 | 18.3               | 34.8                 | [9]       |
| Ru NSs                            | 50.0                 | 61.9               | 37.5                 | This work |

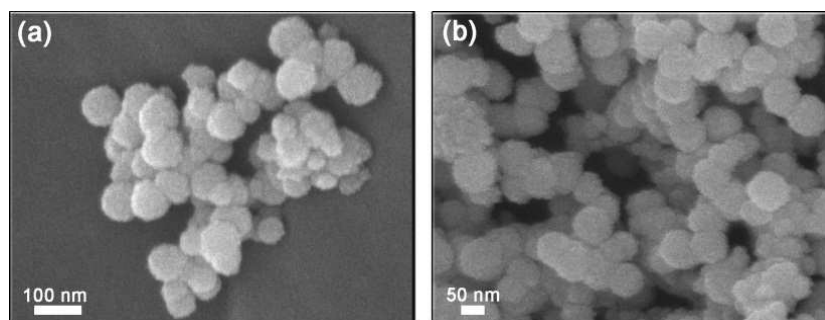

**Figure S1.** (a, b) FESEM images of Ru NSs.

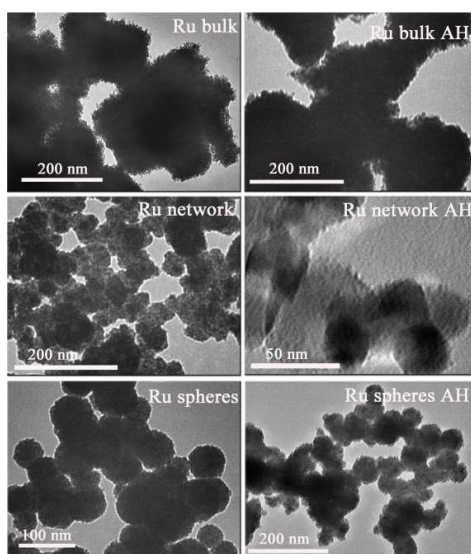

**Figure S2.** TEM images of three different morphology catalysts before and after hydrogenation (AH).

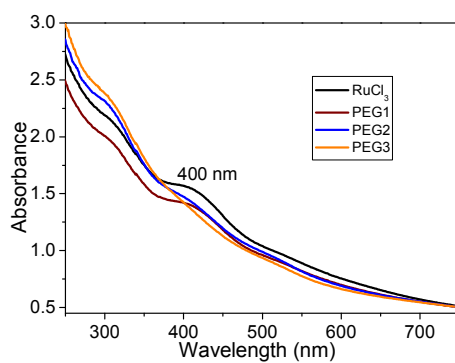

**Figure S3.** UV-Vis spectra of  $\text{Ru}^{3+}$  with different amount of  $\text{PEG}_{10000}$ .  
 PEG1:  $n(\text{Ru}^{3+}):n(\text{PEG})=2.44:1$   
 PEG2:  $n(\text{Ru}^{3+}):n(\text{PEG})=1.22:1$

PEG3: n(Ru<sup>3+</sup>):n(PEG)=0.61:1

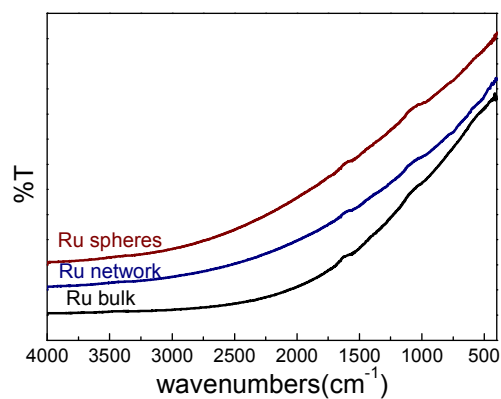

**Figure S4.** FT-IR spectra of three different morphology catalysts. Ru bulk (0.547 mg) in KBr (124.5 mg); Ru network (0.542 mg) in KBr (124.7 mg); Ru spheres( 0.548 mg) in KBr (126.3 mg).

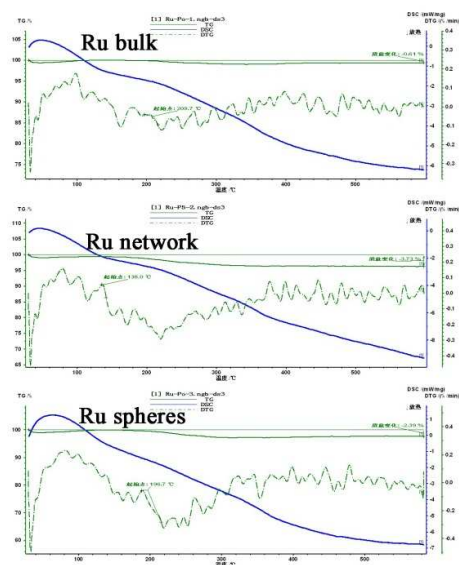

**Figure S5.** TG and DSC curves of three different morphology catalysts measured in Ar atmosphere.

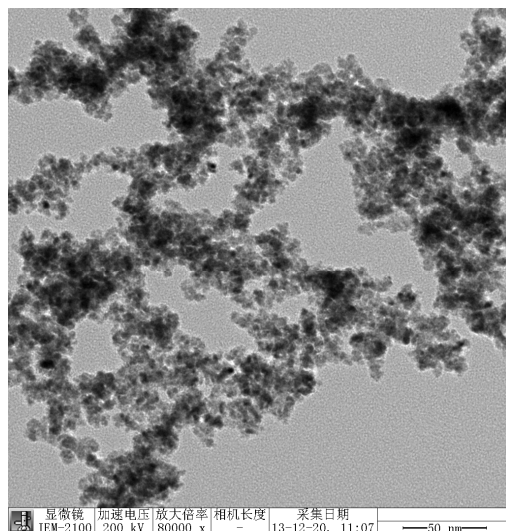

**Figure S6.** TEM image of Ru(0) prepared by coprecipitation.

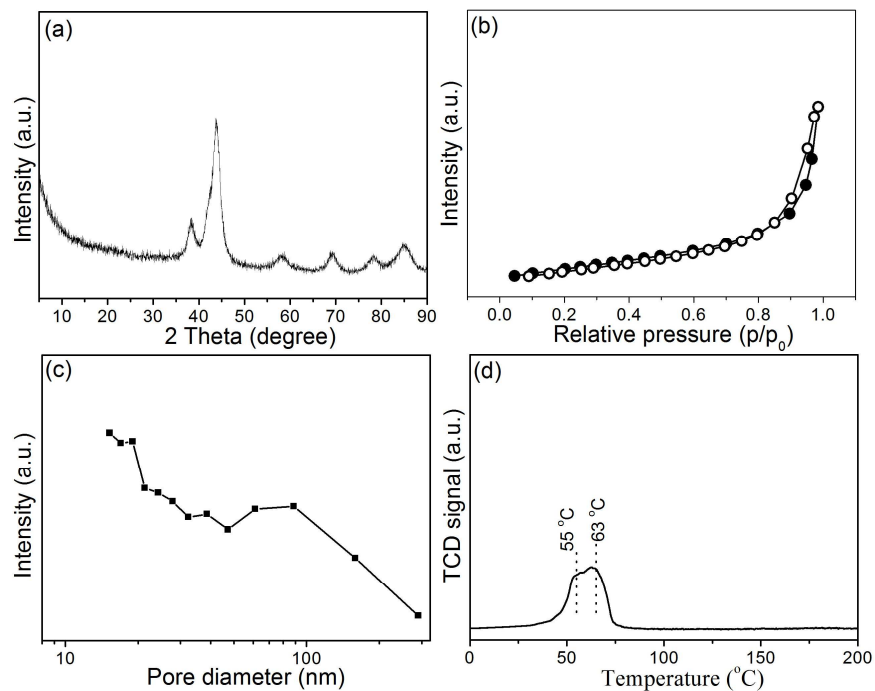

**Figure S7.** (a) XRD patterns, (b) N<sub>2</sub> adsorption (close symbol)-desorption (open symbol) isotherms, (c) pore size distribution curves, and (d) H<sub>2</sub>-TPR profiles of Ru(0) catalysts.

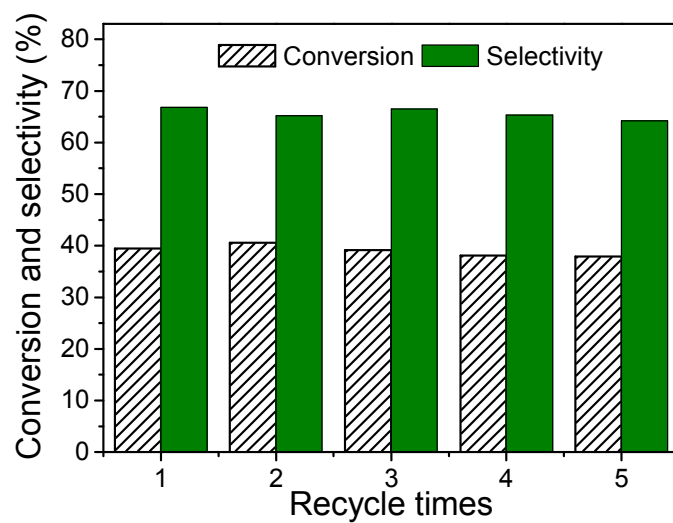

**Figure S8.** Reusability of Ru NSs for benzene-selective hydrogenation towards benzene conversion and CHE selectivity (sampling at 25 min).

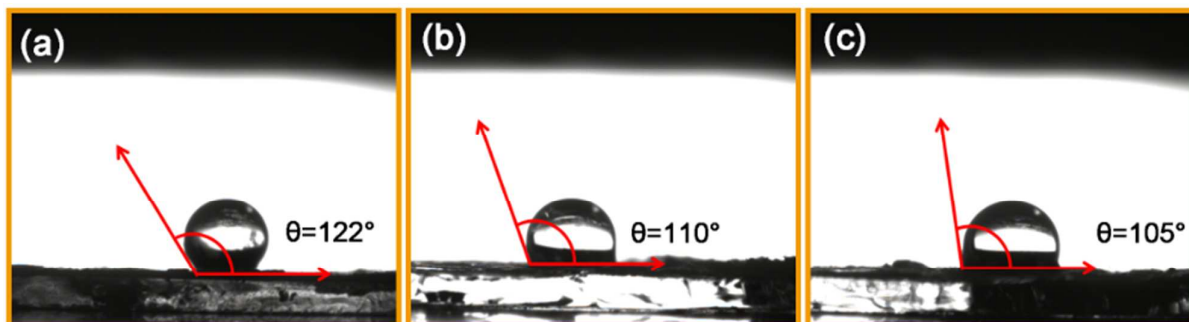

**Figure S9.** The water contact angle test for the (a) Ru bulk, (b) Ru network, and (c) Ru NSs.

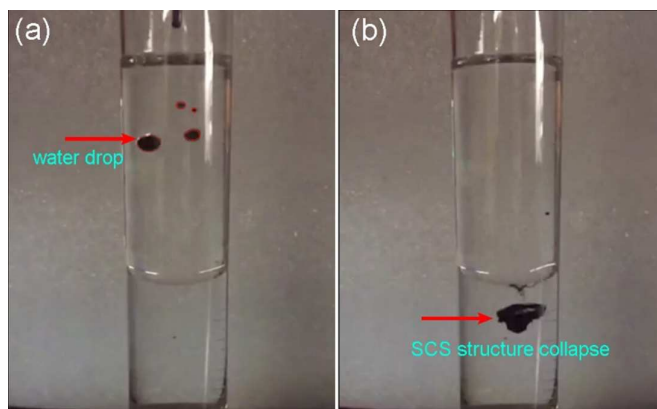

**Figure S10.** illustration of (a) the catalyst particles locating in water drops in benzene phase and (b) the SCS structure collapsing in water phase.

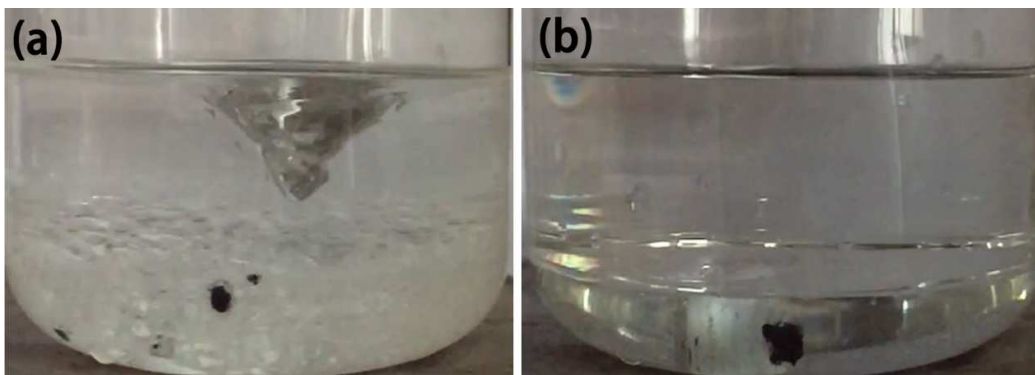

**Figure S11.** Illustration of the Ru SCS structure (a) under stirring and (b) stop stirring.

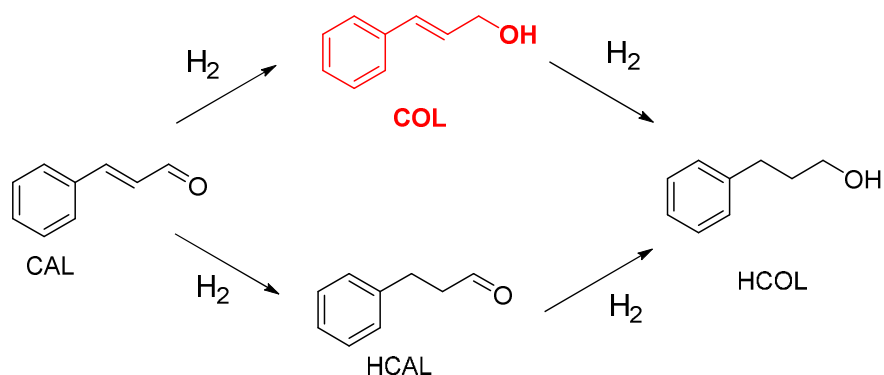

**Figure S12.** Hydrogenation of cinnamaldehyde (CAL) (cinnamyl alcohol (COL) is the preferred product)

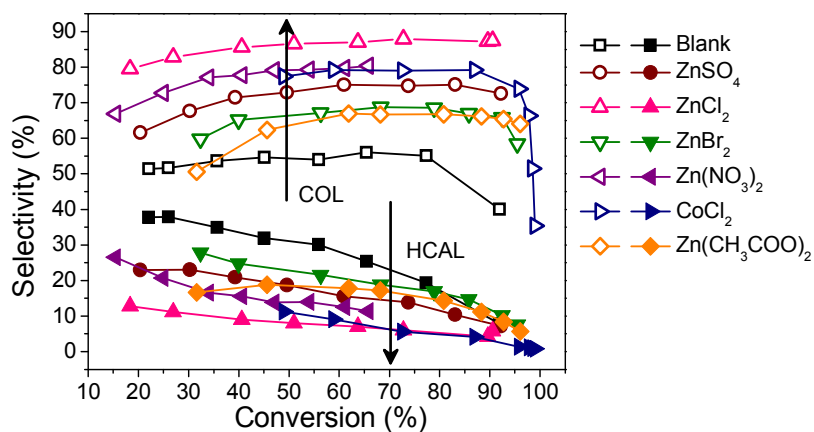

**Figure S13.** The selectivity of COL and HCAL as a function of CAL conversion in the presence of variety of electrolyte solutions. Reaction condition: 0.2 g of catalyst, 48 mL of H<sub>2</sub>O, 12 mL of CAL,  $C_{\text{salt}} = 0.5 \text{ mol L}^{-1}$ , temperature of 70 °C, H<sub>2</sub> pressure of 5.0 MPa, and stirring rate of 800 rpm



## References

- [S1] Schwab, F.; Claus, M. LucasP. Simple Selective Hydrogenation of Benzene to Cyclohexene in the Presence of Sodium Dicyanamide. *Green Chem.* **2013**, *15*, 646-649.
- [S2] Xue, W.; Qin, Y.; Li, F.; Wang, Y. Preparation of Ru-[bmim]BF<sub>4</sub> Catalyst Using NabH<sub>4</sub> as Reducing Agent and Its Performance in Selective Hydrogenation of Benzene. *Chinese J. Catal.* **2012**, *33*, 1913-1918.
- [S3] Wang, W.; Liu, H.; Wu, T.; Zhang, P. Ru Catalyst Supported on Bentonite for Partial Hydrogenation of Benzene to Cyclohexene. *J. Mol. Catal. A-Chem.* **2012**, *355*, 174-179.
- [S4] Schwab, F.; Lucas, M.; Claus, P. Ruthenium-Catalyzed Selective Hydrogenation of Benzene to Cyclohexene in the Presence of an Ionic Liquid. *Angew. Chem. Int. Ed.* **2011**, *50*, 10453-10456.
- [S5] Liu, H.; Jiang, T.; Han, B.; Liang, S. Highly Selective Benzene Hydrogenation to Cyclohexene over Supported Ru Catalyst without Additives. *Green Chem.* **2011**, *13*, 1106.
- [S6] Bu, J.; Pei, Y.; Guo, P.; Qiao, M. Selective Hydrogenation of Benzene over Ru/SBA-15 Catalyst Prepared by the “Double Solvents” Impregnation Method. *Stud. Surf. Sci. & Catal.* **2007**, *165*, 769-772.
- [S7] Zhou, G.; Tan, X.; Dou, R.; Pei, Y. The Size Effect of the Ru/ZrO<sub>2</sub> Catalyst on Partial Hydrogenation of Benzene to Cyclohexene. *Sci. China Chem.* **2014**, *44*, 121.
- [S8] Wang, W.; Liu, H.; Ding, G.; Zhang, P. Ru-Cd/Bentonite for the Partial Hydrogenation of Benzene: a Catalyst without Additives. *ChemCatChem* **2012**, *4*, 1836-1843.
- [S9] Liu, H.; Liang, S.; Wang, W.; Jiang, T. The Partial Hydrogenation of Benzene to Cyclohexene over Ru-Cu Catalyst Supported on ZnO. *J. Mol. Catal. A-Chem.* **2011**, *341*, 35-41.
